# Supplementary material for: LIN28B promotes cell invasion and colorectal cancer metastasis via CLDN1 and NOTCH3
Source: PubMed Central journal article supplement (PMC10443801; doi:10.1172/jci.insight.167310), 2023-07-24
Supplement: jciinsight-8-167310-s128.pdf [file jciinsight-8-167310-s128.pdf]

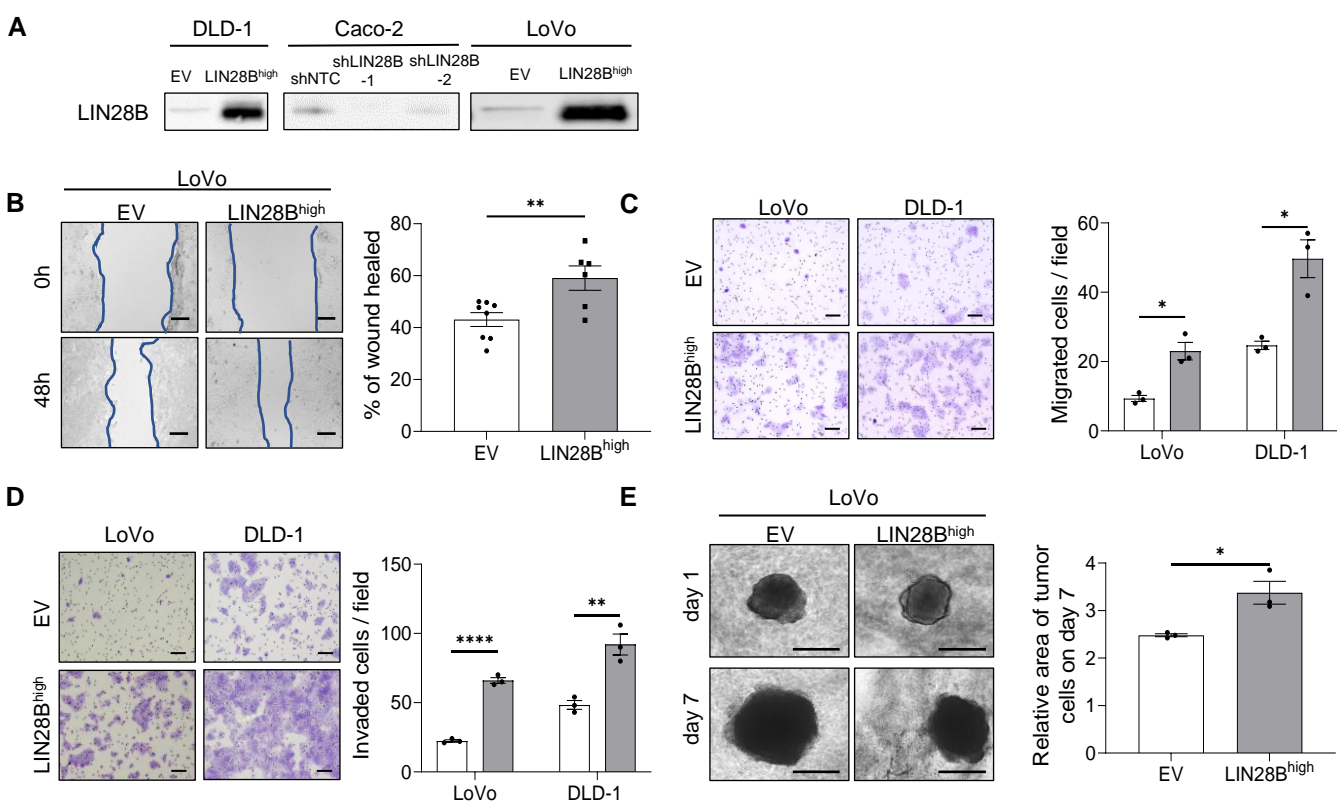

**Supplemental Figure S1. LIN28B promotes cell migration and collective cell invasion of CRC cells.** (A) Representative images of Western blots to measure LIN28B protein expression in DLD-1, Caco-2, and LoVo cells after overexpressing or knockdown of LIN28B. (B) Wound closure of LoVo with empty vector and LIN28B overexpression. Scale bar = 200  $\mu$ m. The graph on right panel shows quantification of the wound area measured by ImageJ. Wound healing rate was defined as '(initial wound area - wound area at 24 or 48 hours) / initial wound area'. Data represented as means  $\pm$  SEM (n=3). (C) 2D transwell migration of LoVo and DLD-1 cells with empty vector and LIN28B overexpression. The graph on right panel shows quantification of the number of migrated cells in fields and is represented as means  $\pm$  SEM (n=3). (D) 2D transwell invasion of LoVo and DLD-1 cells with empty vector and LIN28B overexpression. The graph on right panel shows the number of invaded cells in fields and is represented as means  $\pm$  SEM (n=3). (E) 3D invasion of LoVo cells with empty vector and LIN28B overexpression at 1 and 7 days after incubation. Scale bar = 500  $\mu$ m. The graph on right panel shows tumor area measured by Image J. Data expressed relative to corresponding value on day 1 and is represented as means  $\pm$  SEM (n=3). For all experiments, \*p<0.05, \*\*p<0.01, Student t test.

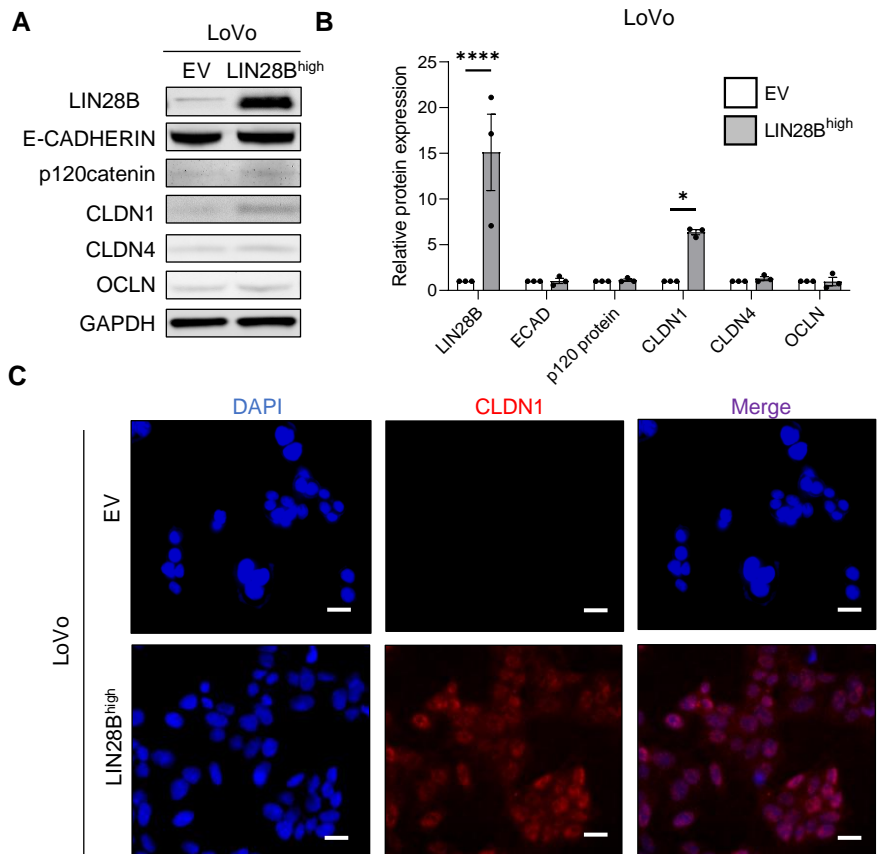

**Supplemental Figure S2. LIN28B overexpression induces CLDN1 upregulation in LoVo cells.** (A) Western blot analysis of proteins related to adherens and tight junctions in LoVo cells with empty vector and LIN28B overexpression. (B) Quantification of the band densities in (A), normalized to GAPDH endogenous control. Data expressed as relative to the corresponding value of cells with empty vector or control and represented as means  $\pm$  SEM (n=3). (C) Immunofluorescent staining of CLDN1 (red) in LoVo with empty vector and LIN28B overexpression. Nuclei were stained by DAPI (blue). Scale bar = 100  $\mu$ m. For all experiments, \*p<0.05, \*\*p<0.01, Student t test.

**A**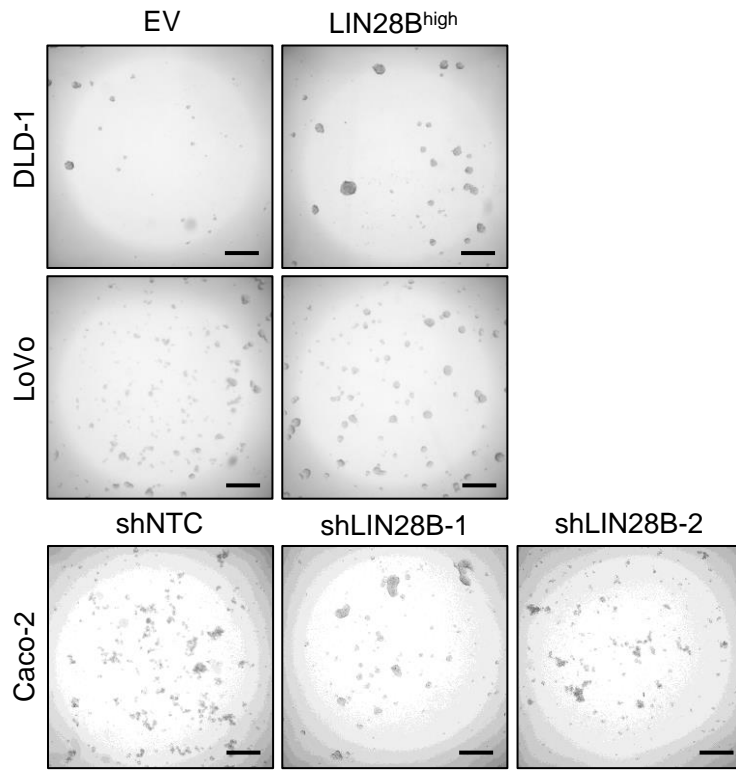**B**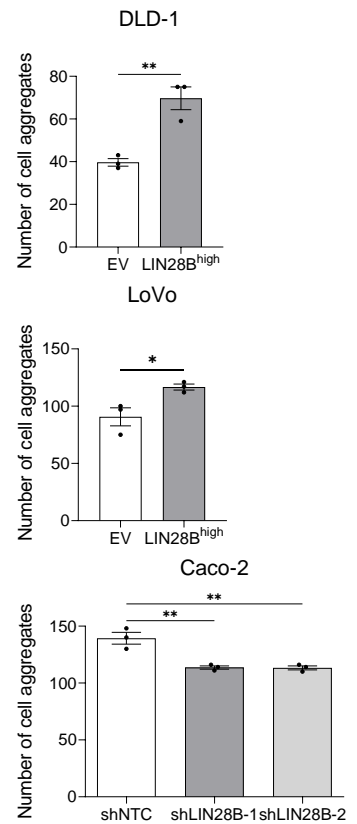

**Supplemental Figure S3. LIN28B regulates CRC cell aggregation.** (A) Representative images of aggregated DLD-1 and LoVo cells with LIN28B overexpression, and Caco-2 cells with LIN28B knockdown taken after 24-hour incubation in ultra-low attachment plate. Scale bar = 500  $\mu$ m. (B) Quantification of cell aggregates counted by Keyence BZ-X810 microscope. Data represented as means  $\pm$  SEM (n=3).

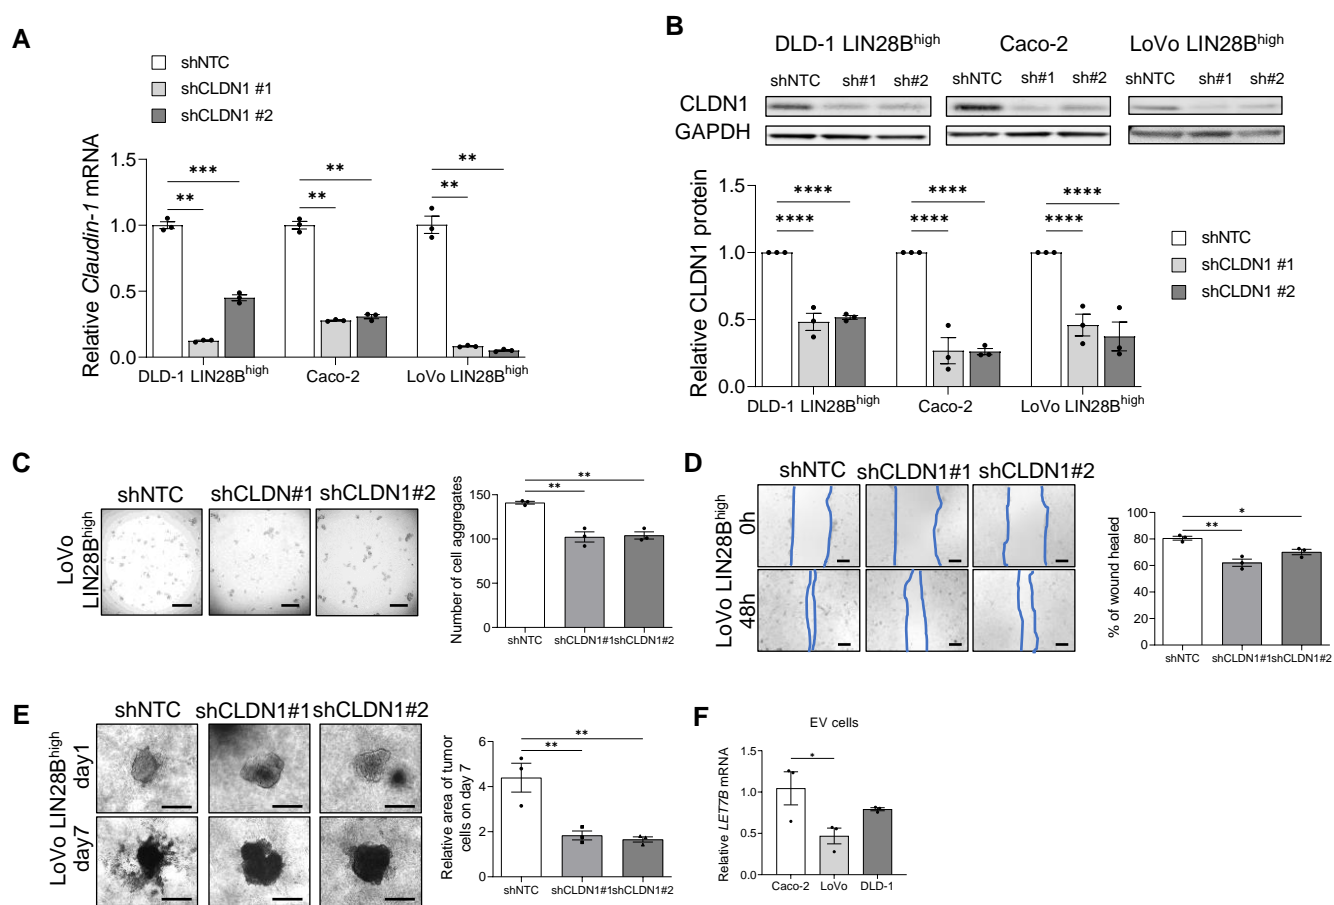

**Supplemental Figure S4. Suppression of CLDN1 inhibits collective cell invasion of CRC cells.** (A) qRT-PCR analysis of CLDN1 mRNA in colon cancer cells transduced by shNTC, shCLDN1 #1 or shCLDN1 #2. Data expressed relative to corresponding value of control cells and represented as means  $\pm$  SEM (n=3). (B) Western blot analysis of CLDN1 in CRC cells transduced by shNTC, shCLDN1 #1 or shCLDN1 #2. The panel below shows the band densities normalized to GAPDH. Data expressed relative to the corresponding value of control cells and represented as means  $\pm$  SEM (n=3). (C) Cell aggregation of LoVo LIN28B<sup>high</sup> cells transduced by shNTC, shCLDN1 #1 or shCLDN1 #2 after 24-hour incubation in ultra-low attachment plate. Scale bar = 500  $\mu$ m. The graph on the right panel shows the number of cell aggregates. Data represented as means  $\pm$  SEM (n=3). (D) Wound closure of LoVo LIN28B<sup>high</sup> cells transduced by shNTC, shCLDN1 #1 or shCLDN1 #2. Scale bar = 200  $\mu$ m. The panel below showed the wound healing rate analyzed by using ImageJ. Data represented means  $\pm$  SEM (n=3). (E) 3D invasion of LoVo LIN28B<sup>high</sup> cells transduced by shNTC, shCLDN1 #1 or shCLDN1 #2 at 1 and 7 days after incubation. Scale bar = 500  $\mu$ m. The graph on the right panel shows the tumor area in measured by Image J. Data expressed relative to corresponding value at day 1 and represented as means  $\pm$  SEM. (F) Relative mRNA expression of LET7B in parental, empty vector colorectal cancer cell lines. Data represented as means  $\pm$  SEM (n=3).

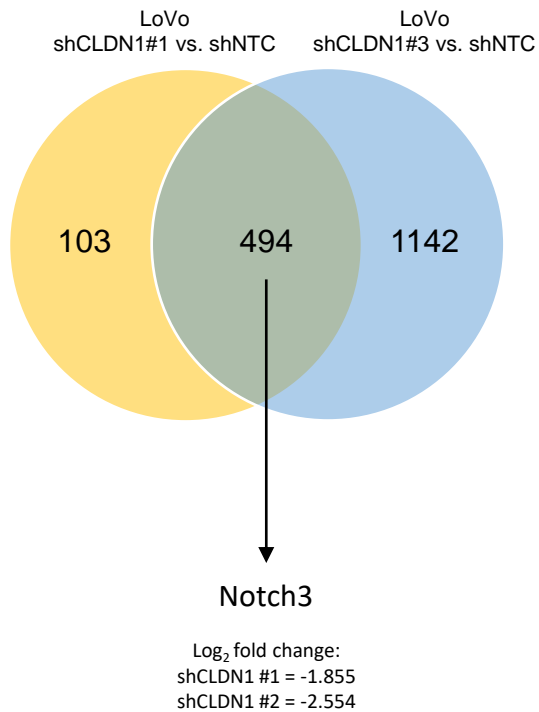

**Supplemental Figure S5. NOTCH3 is down-regulated upon CLDN1 knock-down in LIN28B<sup>high</sup> CRC cells.** Venn diagram showing the number of genes that are commonly changed between shCLDN1 #1 and shCLDN1 #2 in LoVo LIN28B<sup>high</sup> cells.

**Supplemental Figure S6. Suppression of NOTCH3 inhibits LIN28B-induced cell migration, collective cell invasion, and liver metastasis formation.** (A) qRT-PCR analysis of NOTCH3 mRNA in LoVo LIN28B<sup>high</sup> shNTC, shCLDN1 #1 or shCLDN1 #2. (B) qRT-PCR analysis of NOTCH3 mRNA in LoVo LIN28B<sup>high</sup> shNTC, shNOTCH3 #1 or shNOTCH3 #2. (C) qRT-PCR analysis of CLDN1 mRNA in DLD-1 and LoVo LIN28B<sup>high</sup> cells with shNOTCH3 #1 or shNOTCH3 #2. (D) Wound closure of LoVo LIN28B<sup>high</sup> cells transfected by shNTC, shNOTCH3 #1 or shNOTCH3 #2. Scale bar = 200  $\mu$ m. Wound healing rate was analyzed by using ImageJ. Data represented as means  $\pm$  SEM (n=3). (E) Representative images of the aggregation assay in LoVo LIN28B<sup>high</sup> cells transfected by shNTC, shNOTCH3 #1 or shNOTCH3 #2. The number of cell aggregates were counted by Keyence BZ-X810. Data represented as means  $\pm$  SEM (n=3). (F) Representative images of liver metastasis, visualized by the RFP expression of LoVo LIN28B<sup>high</sup> cells and detected by Keyence BZ-X810. The graph on right shows the quantification of the liver metastases expressed as the proportion of mice that have visible liver tumors.

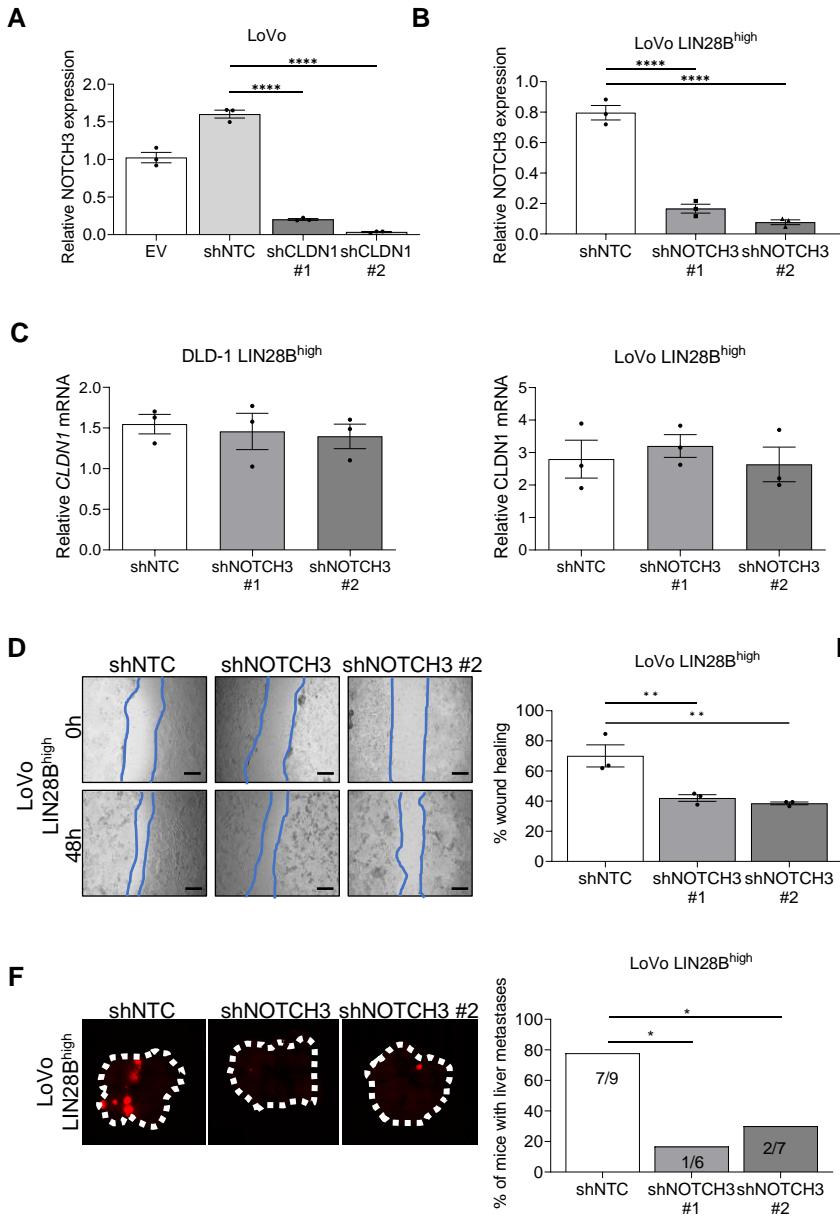

**A**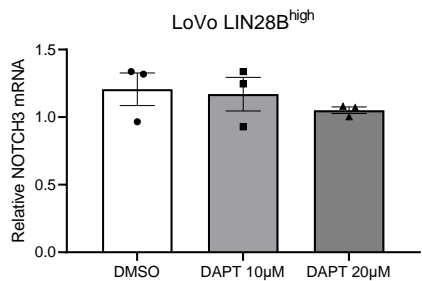**B**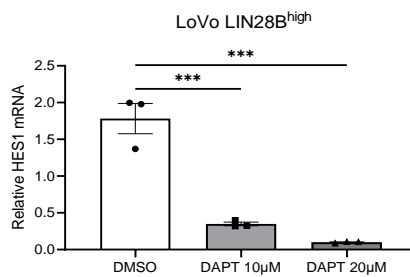**C**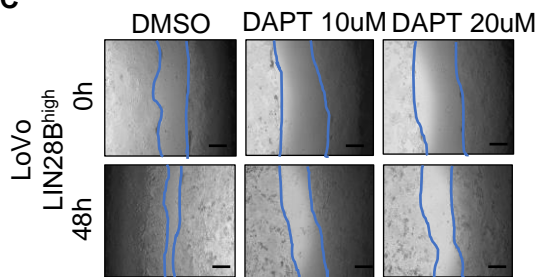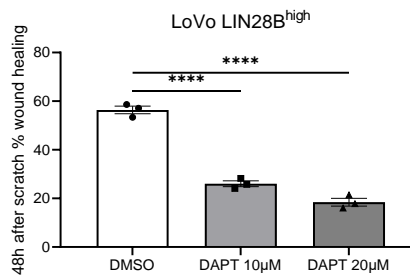**D**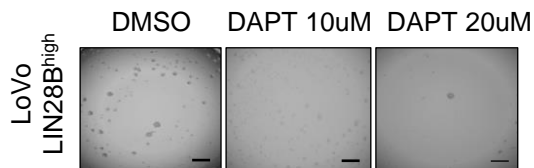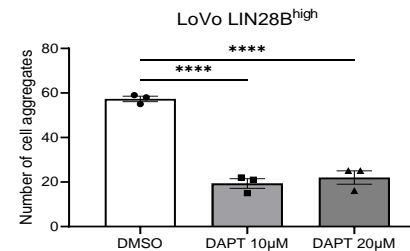**E**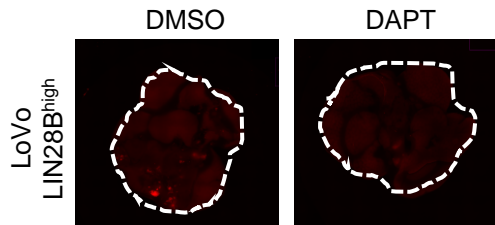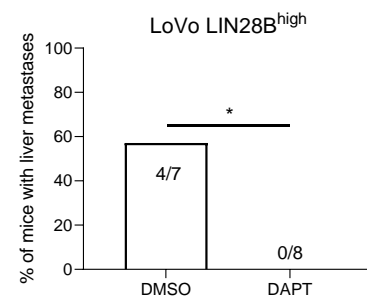

**Supplemental Figure S7. Inhibition of NOTCH signaling by DAPT inhibits LIN28B-induced collective cell invasion, cell migration, and liver metastasis formation.** (A) qRT-PCR analysis of *NOTCH3* mRNA in LoVo LIN28B<sup>high</sup> cells treated DMSO, 10  $\mu$ M DAPT or 20  $\mu$ M DAPT. (B) qRT-PCR analysis of *HES1* mRNA in LoVo LIN28B<sup>high</sup> cells treated with DMSO, 10  $\mu$ M DAPT or 20  $\mu$ M DAPT. (C) Wound closure of LoVo LIN28B<sup>high</sup> cells treated with DMSO, 10  $\mu$ M DAPT or 20  $\mu$ M DAPT. Scale bar = 200  $\mu$ m. Wound healing rate was analyzed by using ImageJ. Data represented as means  $\pm$  SEM (n=3). (D) Representative images of cellular aggregation of LoVo LIN28B<sup>high</sup> cells treated with DMSO, 10  $\mu$ M DAPT or 20  $\mu$ M DAPT. The number of cell aggregates were counted by Keyence BZ-X810. Data represented as means  $\pm$  SEM (n=3). (E) Representative images of liver metastasis, visualized by the RFP expression of LoVo LIN28B<sup>high</sup> cells and detected by Keyence BZ-X810.



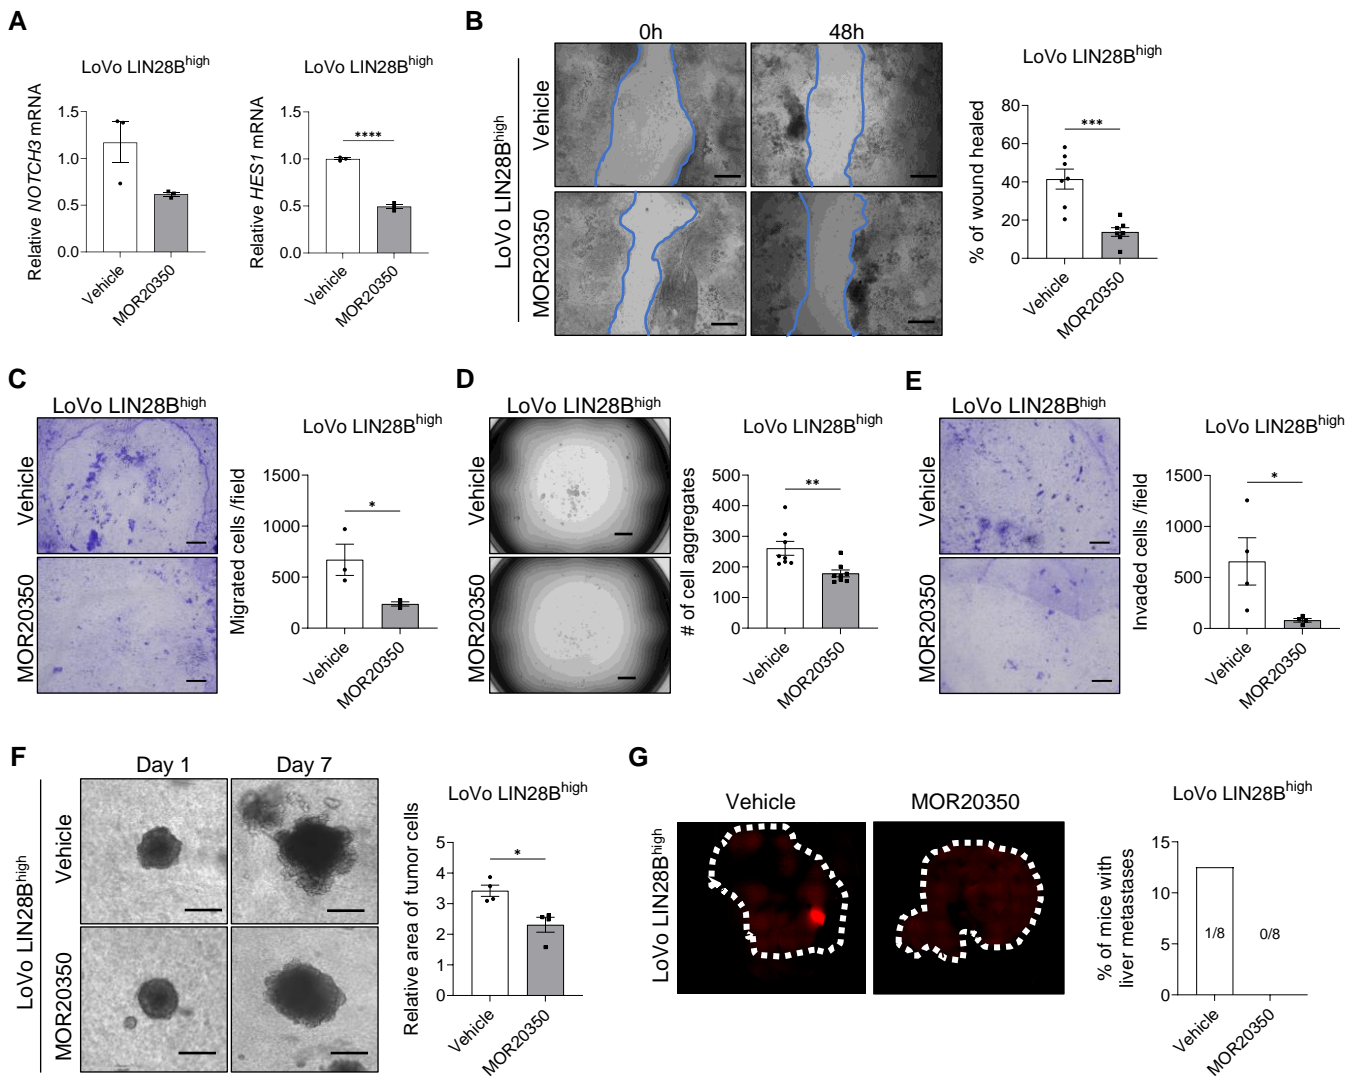

**Supplemental Figure S8. Pharmacologic inhibition of Notch3 reduces LIN28B-induced liver metastasis in LoVo cells.** (A) qRT-PCR analysis of NOTCH3 and HES1 mRNA in LoVo LIN28B<sup>high</sup> cells treated with vehicle or 10  $\mu$ M MOR20350 for 48 hours. (B) Representative images and quantification of the wound closure scratch assay. Scale bar = 200  $\mu$ m. Area of the wound was measured by using ImageJ. (C) Representative images and quantification of the 3D aggregation assay. The number of cell aggregates were counted using Keyence BZ-X810. (D) Representative images and quantification of 2D invasion assay. Cells that have invaded through the 8  $\mu$ m pore and the ECM were counted using Keyence BZ-X810. (E) Representative images and quantification of 2D migration assay. Cells that have migrated through the 8  $\mu$ m pore were counted using Keyence BZ-X810. (F) Representative images and quantification of the 3D invasion assay. Scale bar = 500  $\mu$ m. (G) Representative images of RFP expressed by LoVo LIN28B<sup>high</sup> tumors in the liver. Images were taken using Keyence BZ-X810. Data in graphs A-F are represented as means  $\pm$  SEM and were analyzed by one-way ANOVA followed by Tukey's multiple comparison test. Graph in G was analyzed by Fisher's exact test.

**A**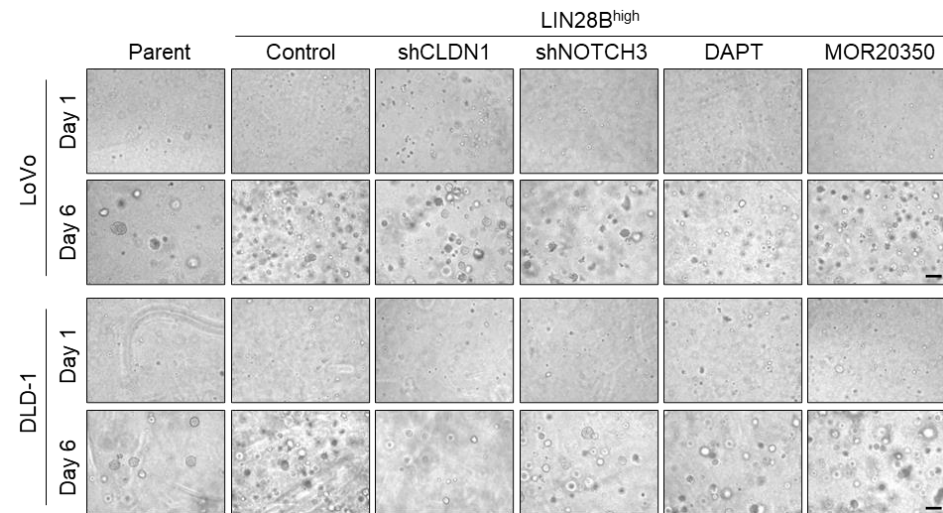**B**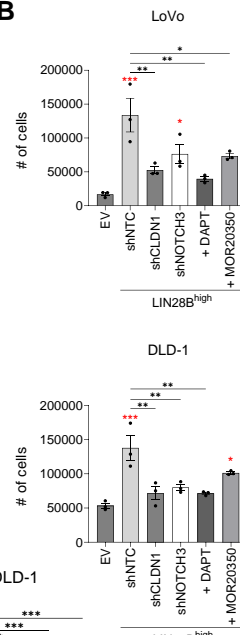**C**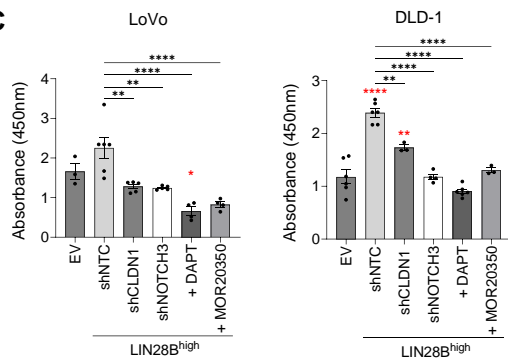**D**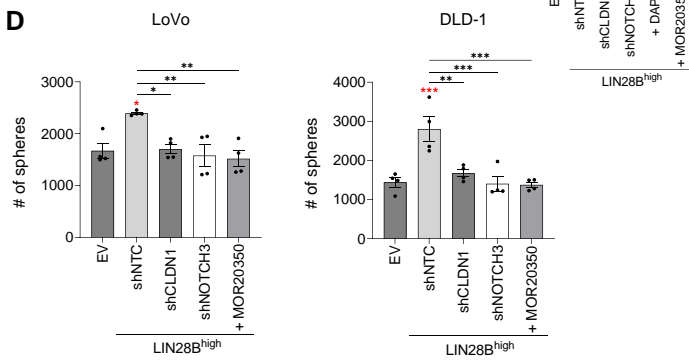**E**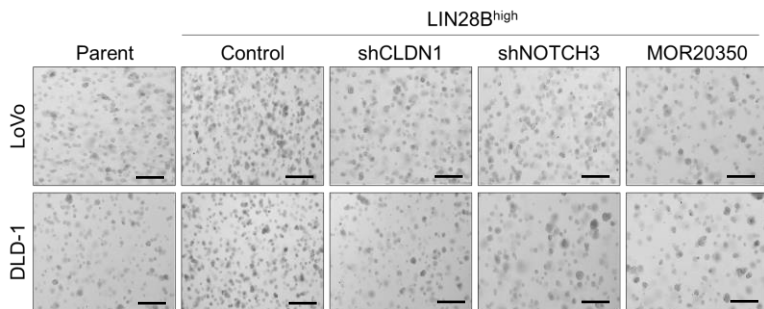

**Supplemental Figure S9. The LIN28B-CLDN1-NOTCH3 axis promotes CRC cell proliferation in 2D and 3D cultures.** (A) Representative images of colonies formed in soft agar on days 1 and 6 post culture. (B) The number of viable cells in the soft agar colony formation assay were quantified by the 3-(4,5-Dimethylthiazol-2-yl)-2,5-diphenyltetrazolium bromide (MTT) assay on day 6. Data are represented as means  $\pm$  SEM (n=3). (C) The number of proliferating cells in 2D culture were quantified by WST-1 assay on day 5 post culture. Data represented as means  $\pm$  SEM (n=3-6). (D) Quantification of the number of spheres counted after 7 days post culture in Matrigel. (E) Representative images of spheres formed after 7 days post culture in Matrigel. Red asterisks above each bar indicate statistical significance compared to the empty vector (EV) control group. Graphs in B and C were analyzed by one-way ANOVA followed by Tukey's multiple comparison test.

**Supplemental Table 1.** Number of primary colorectal tumors and corresponding liver metastases based on their expression of LIN28B, CLDN1, and NOTCH3.

Primary CRC

|                        | CLDN1 <sup>high</sup> | CLDN1 <sup>low</sup> |
|------------------------|-----------------------|----------------------|
| LIN28B <sup>high</sup> | 20                    | 7                    |
| LIN28B <sup>low</sup>  | 7                     | 32                   |

p<0.0001

|                        | NOTCH3 <sup>high</sup> | NOTCH3 <sup>low</sup> |
|------------------------|------------------------|-----------------------|
| LIN28B <sup>high</sup> | 13                     | 14                    |
| LIN28B <sup>low</sup>  | 5                      | 34                    |

P=0.0022

Corresponding liver metastasis

|                        | CLDN1 <sup>high</sup> | CLDN1 <sup>low</sup> |
|------------------------|-----------------------|----------------------|
| LIN28B <sup>high</sup> | 30                    | 8                    |
| LIN28B <sup>low</sup>  | 5                     | 23                   |

p<0.0001

|                        | NOTCH3 <sup>high</sup> | NOTCH3 <sup>low</sup> |
|------------------------|------------------------|-----------------------|
| LIN28B <sup>high</sup> | 24                     | 14                    |
| LIN28B <sup>low</sup>  | 4                      | 24                    |

P=0.0001

**Supplemental Table 2.** Target Sequences of shRNA

| <b>Name</b>         | <b>Catalog Number</b> |
|---------------------|-----------------------|
| shNTC for shLIN28B  | CSHCTR001-2-LVRH1GP   |
| shLIN28B #1         | HSH101662-LVRH1GP-a   |
| shLIN28B #2         | HSH101662-LVRH1GP-c   |
| shNTC for shCLDN1   | CSHCTR001-2-LVRU6MH   |
| shCLDN1 #1          | HSH088484-LVRU6MH-a   |
| shCLDN1 #2          | HSH088484-LVRU6MH-c   |
| shNTC for sh NOTCH3 | CSHCTR001-LVRH1GP     |
| shNOTCH3 #1         | HSH011876-LVRH1GP-b   |
| shNOTCH3 #2         | HSH011876-LVRH1GP-c   |

**Supplemental Table 3. PCR primers**

| <b>Target gene</b> | <b>Sequence</b>                                                            |
|--------------------|----------------------------------------------------------------------------|
| GAPDH              | Forward;5'-TCAAGAAGGTGGTGAAGAAG-3'<br>Reverse; 5'-AAAGGTGGAGGAGTGGGTGT-3'  |
| CLDN1              | Forward;5'-CCCTATGACCCCAGTCAATG-3'<br>Reverse;5'-ACCTCCCAGAAGGCAGAGA-3'    |
| NOTCH3             | Forward;5'-GCTCAACGGCACTGATCCT-3'<br>Reverse;5'-AGCCCGTGTAAGGCTGATT-3'     |
| HES1               | Forward 5'-ACGTGCGAGGGCGTTAATAC-3'<br>Reverse:5'-ATTGATCTGGGTCATGCAGTTG-3' |

**Supplemental Table 4.** List of antibodies

| Antibody    | Manufacturer and Catalog Number | RRID       | Host Species | Clonality  | Dilution |       |        |
|-------------|---------------------------------|------------|--------------|------------|----------|-------|--------|
|             |                                 |            |              |            | WB       | ICC   | IHC    |
| CLDN1       | Invitrogen, 37-4900             | AB_431448  | Mouse        | Monoclonal |          | 1:250 |        |
| CLDN1       | Invitrogen, 71-7800             | AB_88416   | Rabbit       | Polyclonal | 1:500    |       | 1:100  |
| LIN28B (h)  | Cell Signaling Technology, 4196 | AB_2135047 | Rabbit       | Polyclonal | 1:1000   |       |        |
| LIN28B (h)  | Sigma-Aldrich, HPA061745        | AB_2684601 | Rabbit       | Polyclonal |          |       | 1:1000 |
| LIN28B (m)  | Proteintech, 16178-1-AP         | AB_2135051 | Rabbit       | Polyclonal |          |       | 1:200  |
| E-CADHERIN  | Cell Signaling Technology, 3195 | AB_2291471 | Rabbit       | Monoclonal | 1:1000   |       |        |
| p120catenin | BD Transduction, 610134         | AB_397537  | Mouse        | Monoclonal | 1:1000   |       |        |
| CLDN4       | Invitrogen, 32-9400             | AB_2533096 | Mouse        | Monoclonal | 1:500    |       |        |
| OCLN        | Invitrogen, 33-1500             | AB_2533101 | Mouse        | Monoclonal | 1:1000   |       |        |
| GAPDH       | EMD Millipore, MAB374           | AB_2107445 | Mouse        | Monoclonal | 1:5000   |       |        |
| GFP         | Cell Signaling Technology, 2956 | AB_1196615 | Rabbit       | Monoclonal |          |       | 1:400  |
