# Supplementary material for: LIN28B promotes cell invasion and colorectal cancer metastasis via CLDN1 and NOTCH3
Source: JCI journal article supplement (doi:10.1172/jci.insight.167310), 2023-06-15
Supplement: sd1 [file 1]

You are being redirected.
